# Supplementary material for: MEN1 silencing aggravates tumorigenic potential of AR-independent prostate cancer cells through nuclear translocation and activation of JunD and β-catenin
Source: Springer Nature journal article supplement (doi:10.1186/s13046-021-02058-7), 2021-08-26

Fig. S1

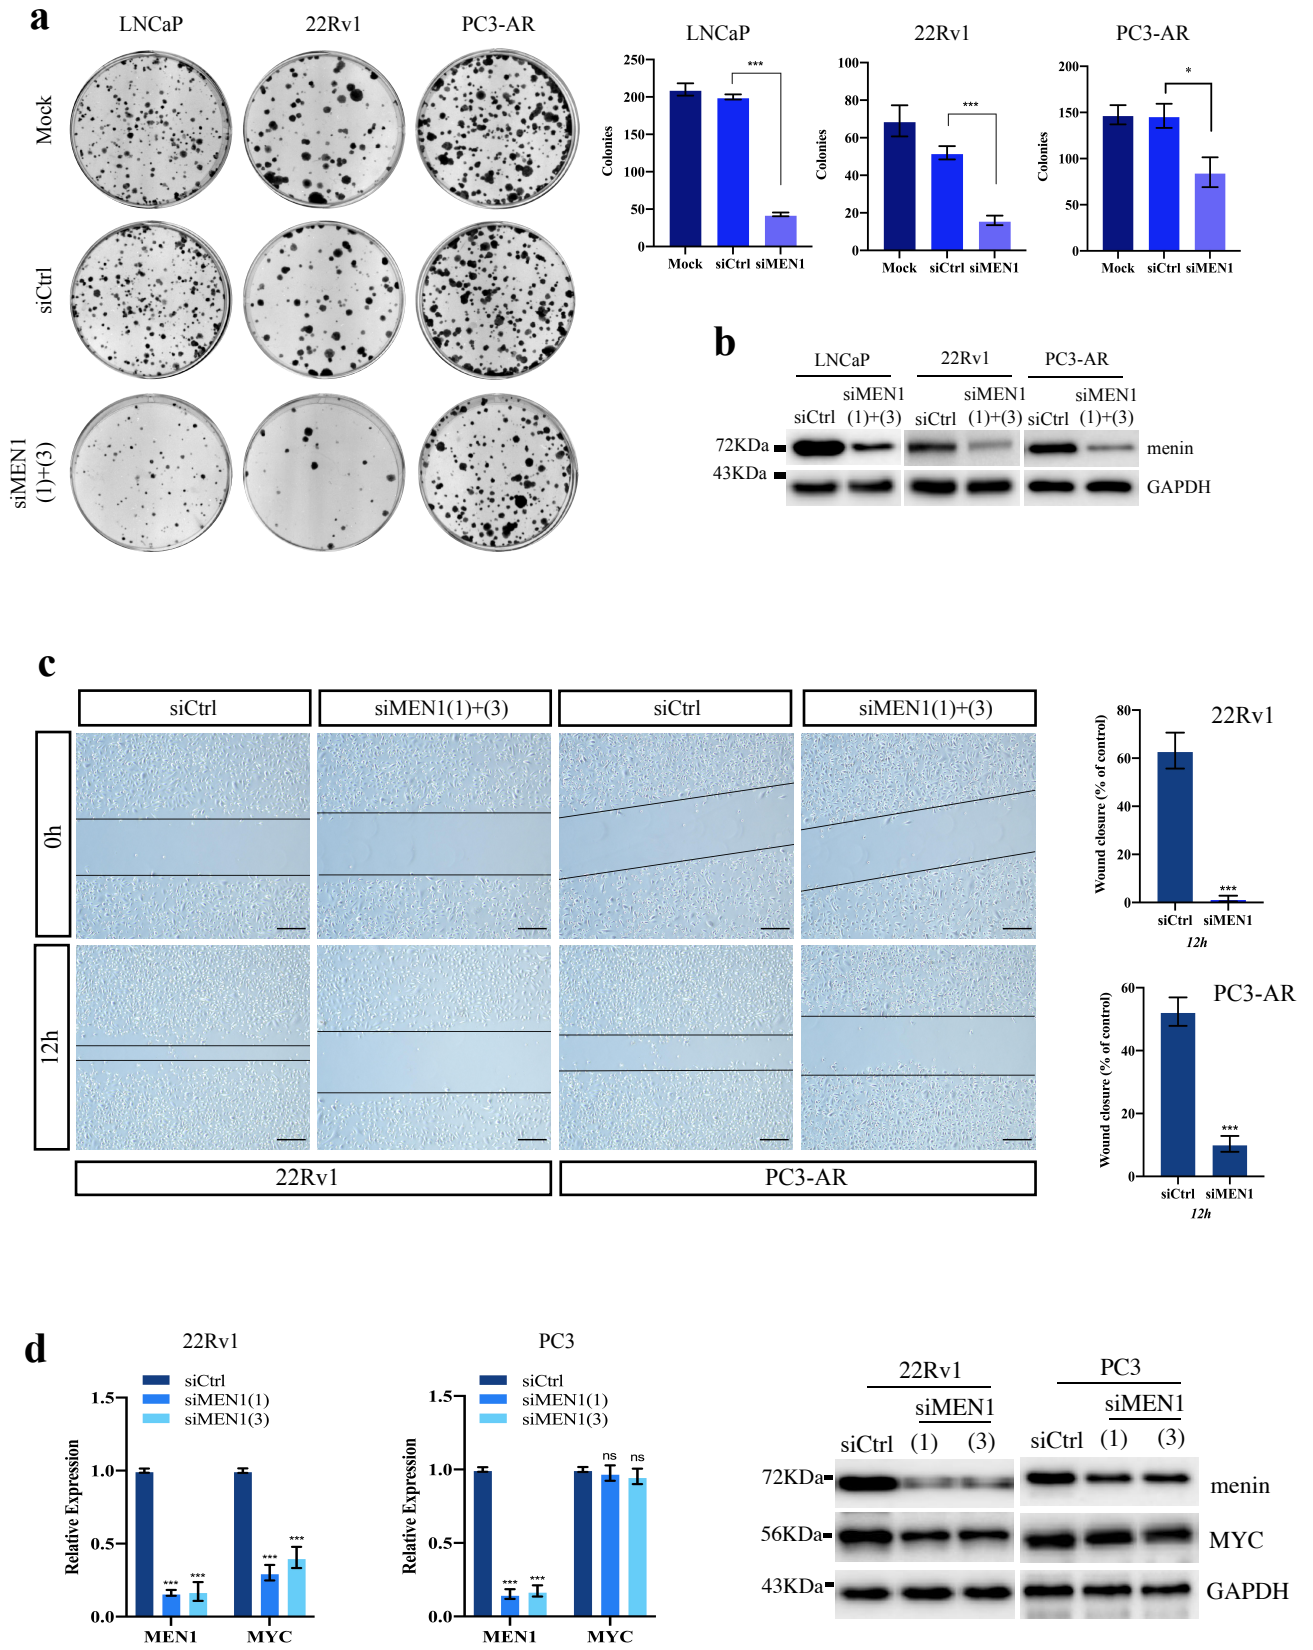

Fig. S2

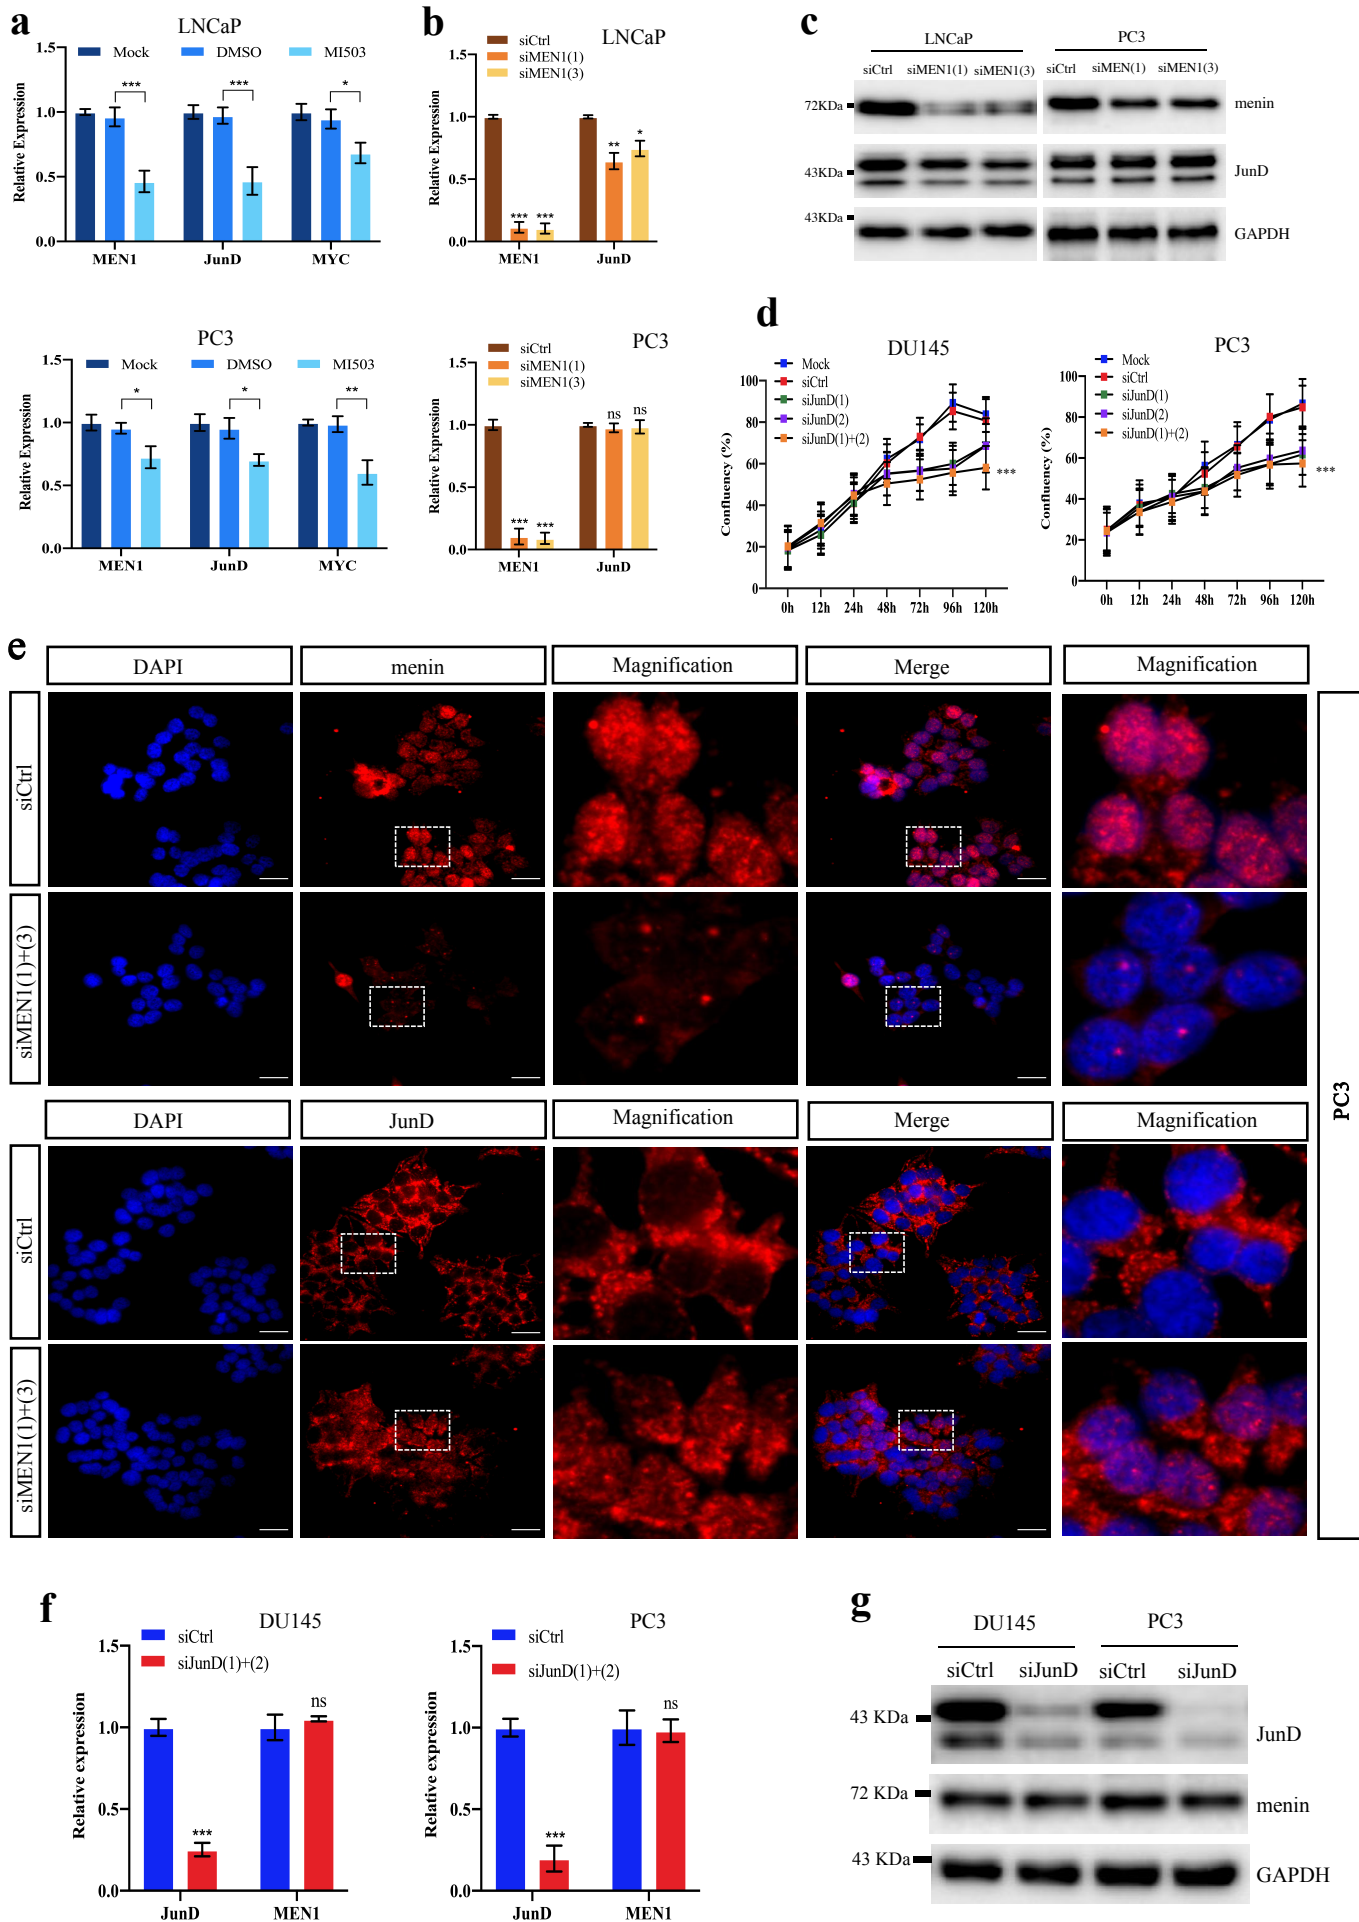

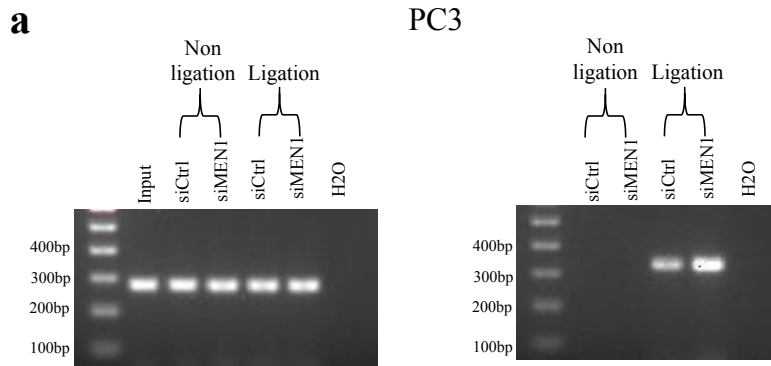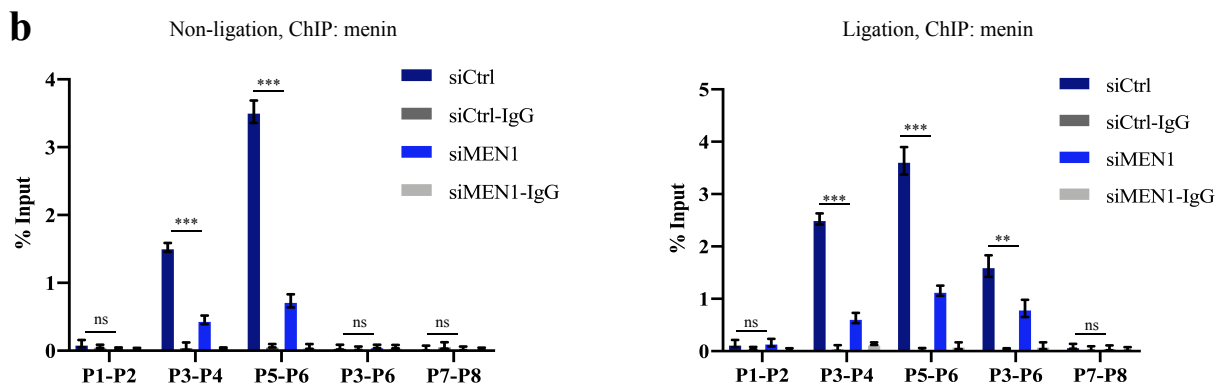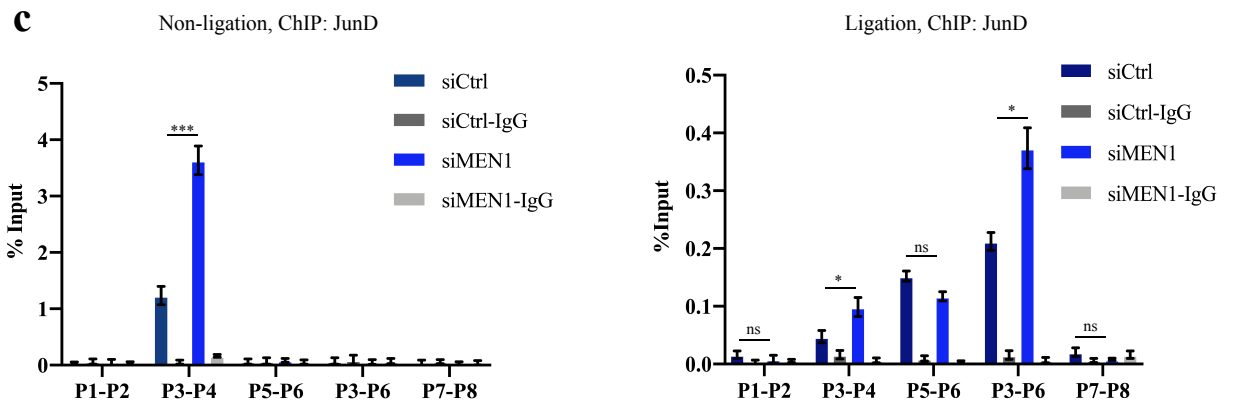

Fig. S4

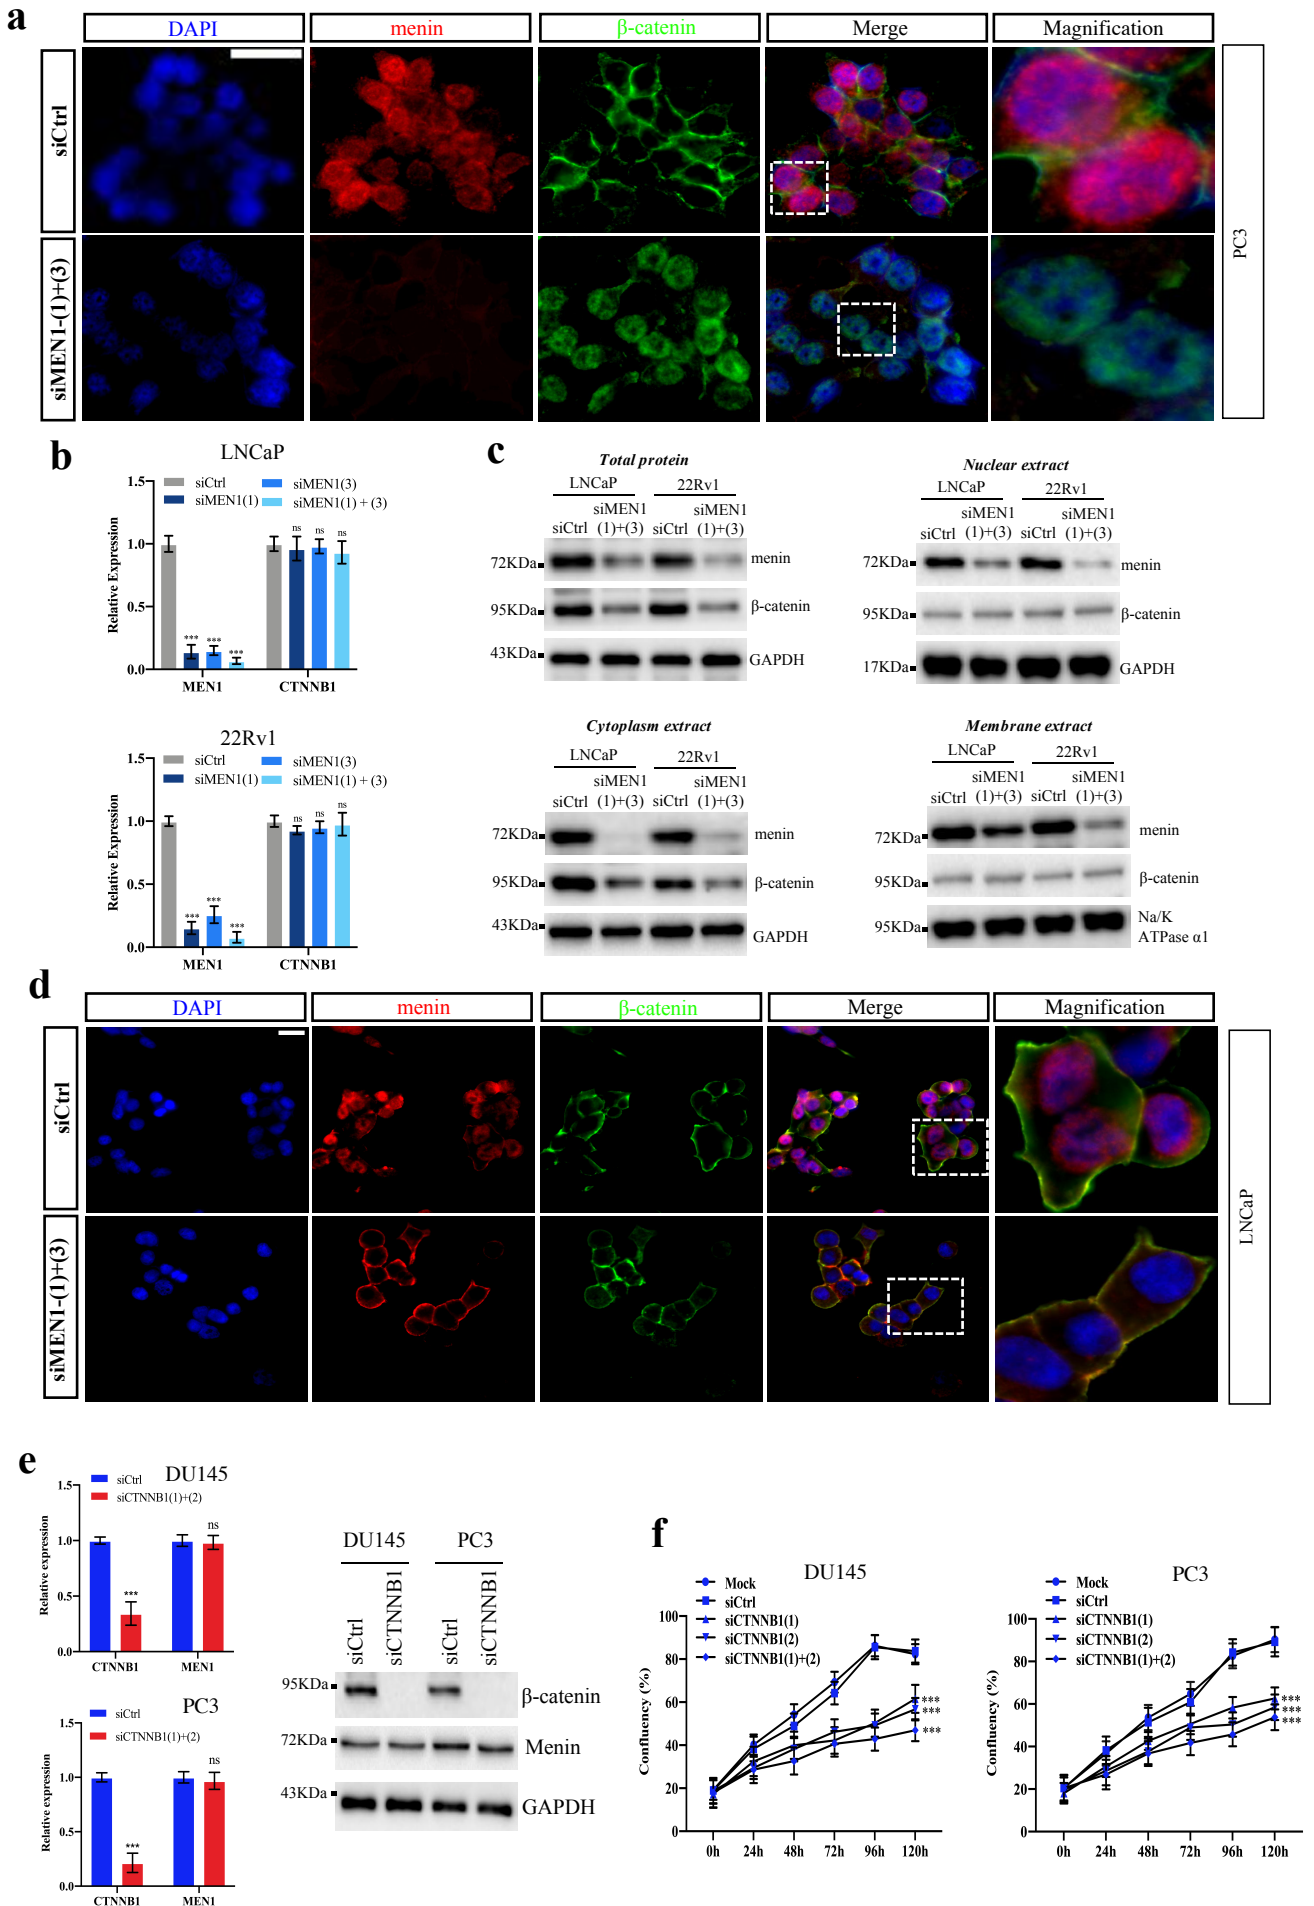

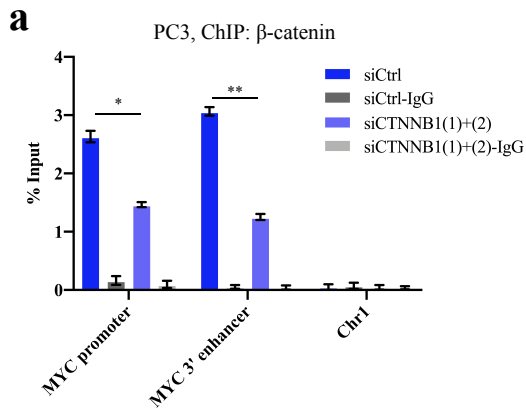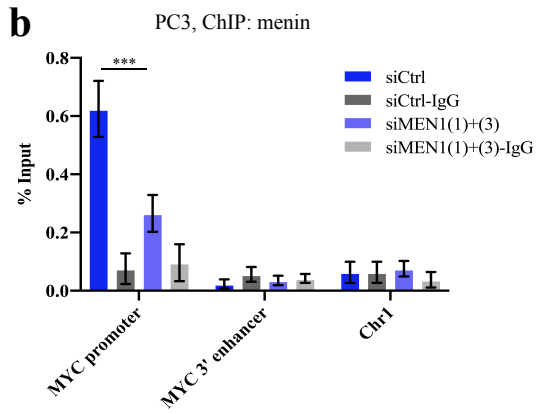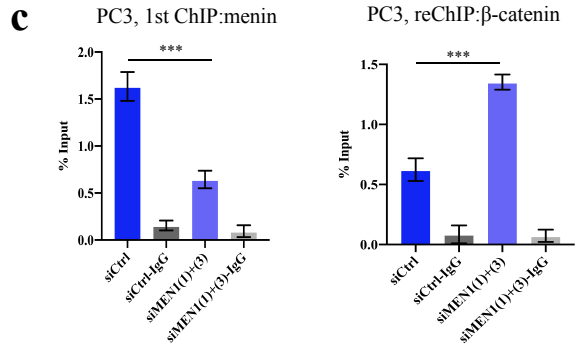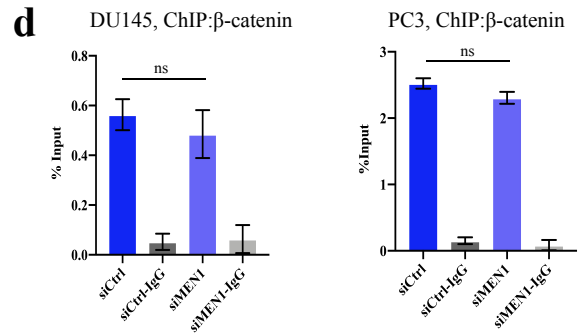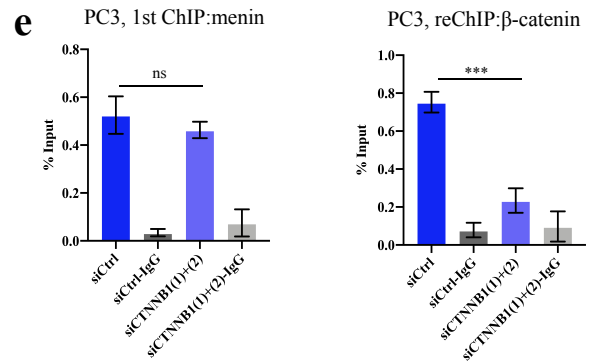

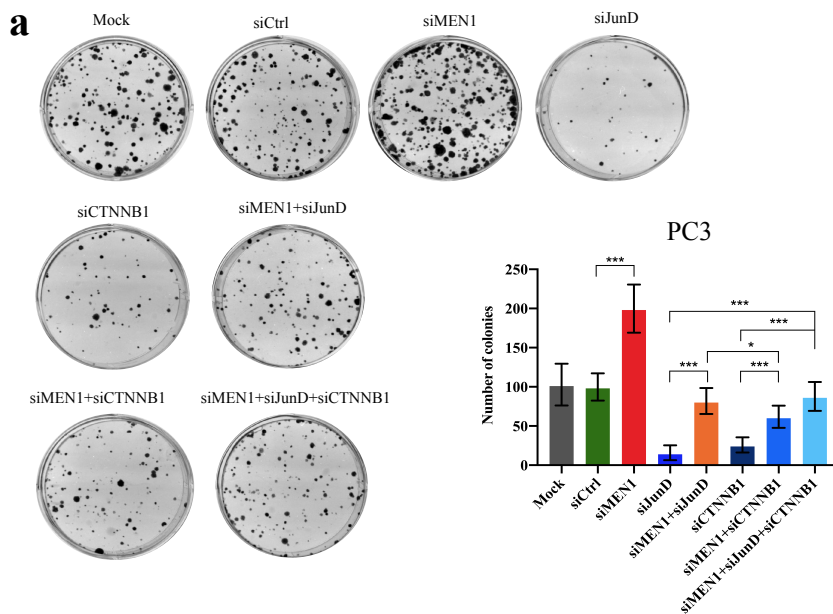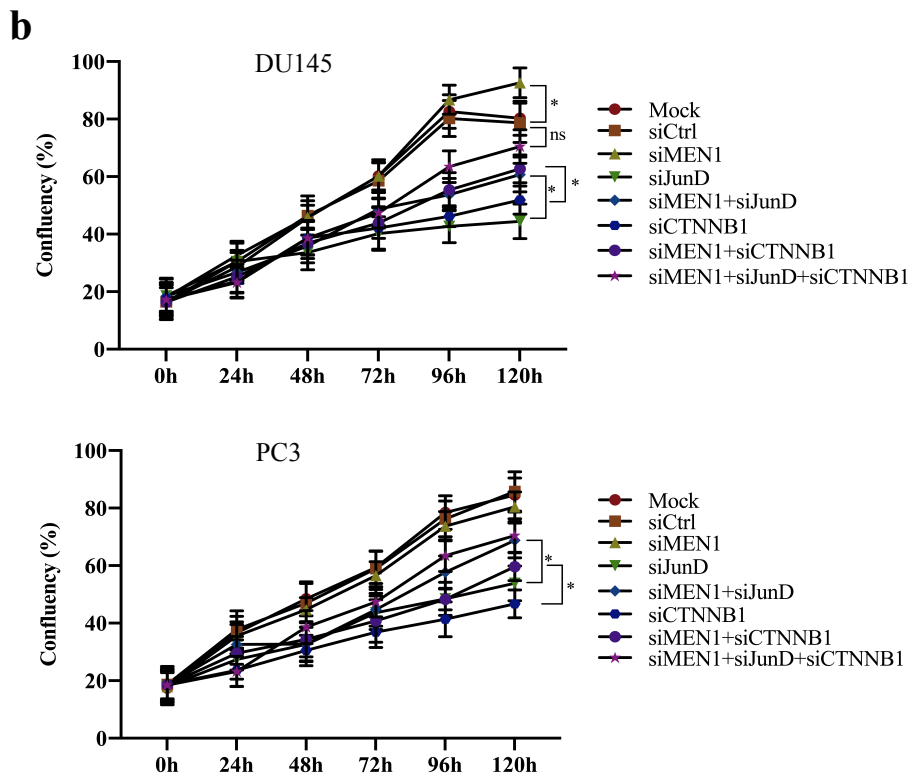

Fig. S7

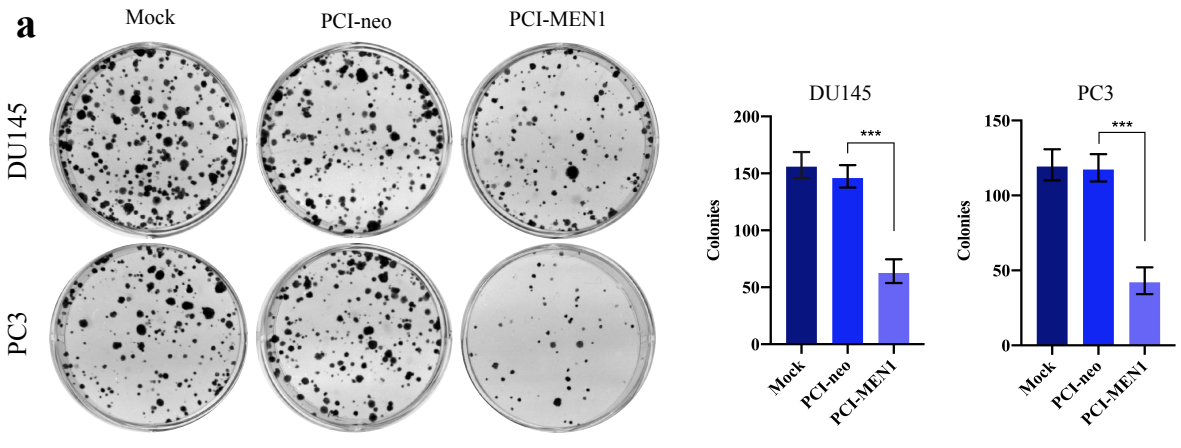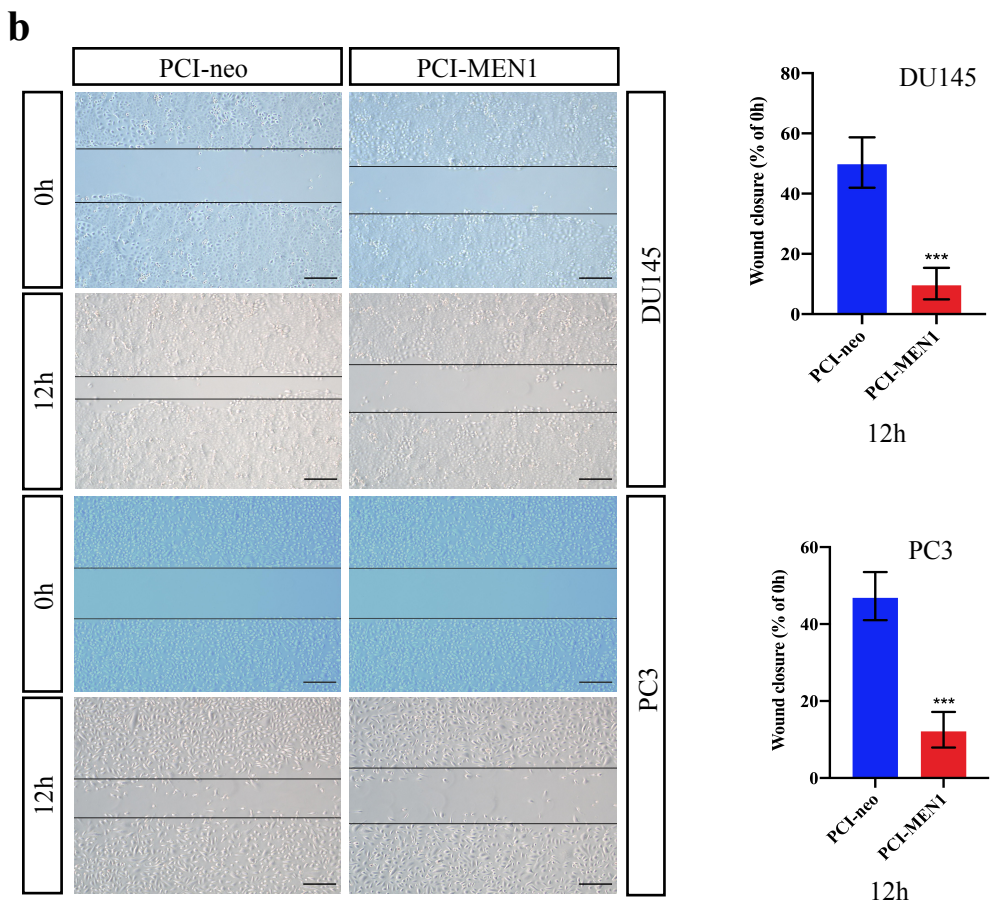

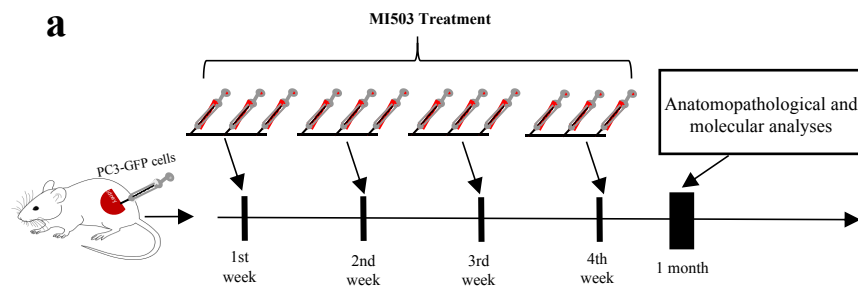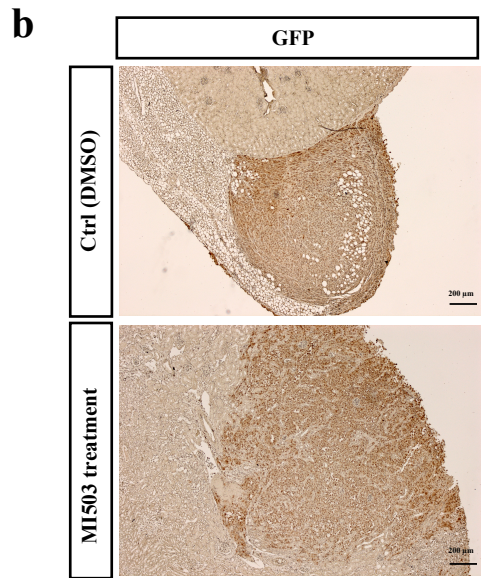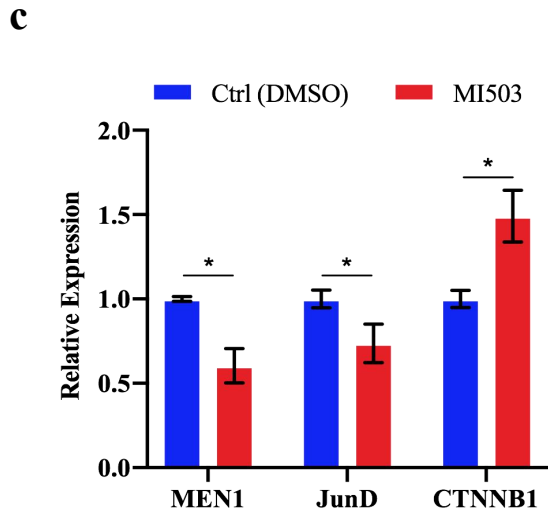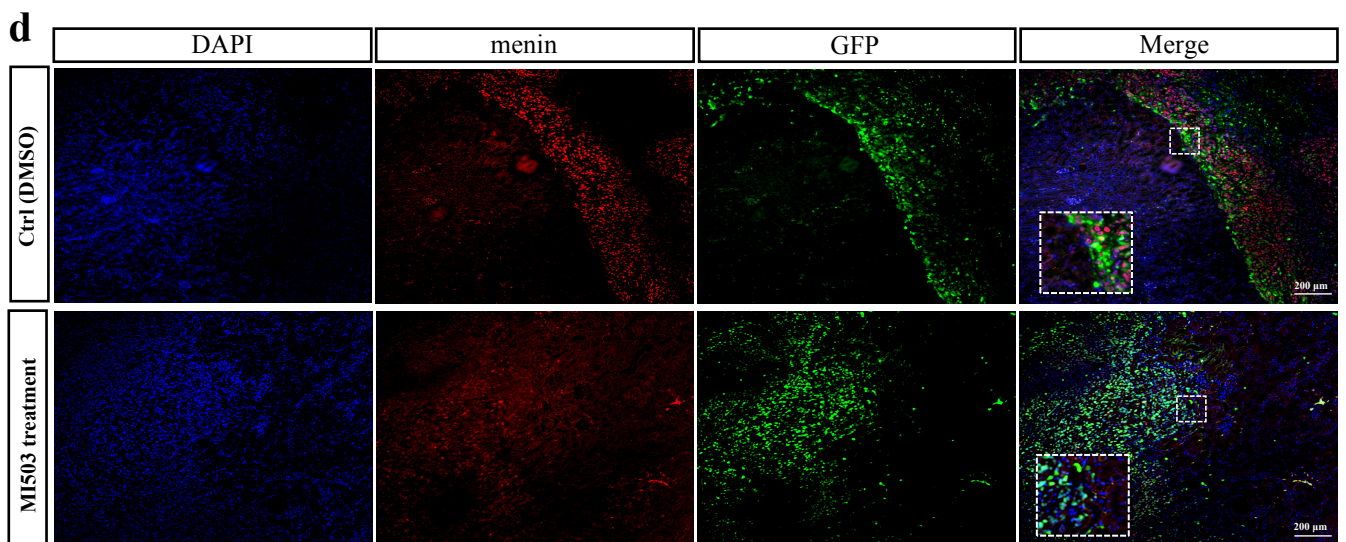

Supplement: 13046_2021_2058_MOESM2_ESM.pdf [file 13046_2021_2058_MOESM2_ESM.pdf]
